# Supplementary material
Source: HighWire-hosted journal article supplement (https://bmjopen.bmj.com/content/15/5/e093401)
Supplement: inline-supplementary-material-2 [file inline-supplementary-material-2.pdf]

Table S1. The characteristics of studies included in the review

| Author(s) and year | Country | Study design | Study setting | Study goal/objectives | Target population | Sample size | Outcomes measured | Measurement instruments | Results |
|--------------------|---------|--------------|---------------|-----------------------|-------------------|-------------|-------------------|-------------------------|---------|
|                    |         |              |               |                       |                   |             |                   |                         |         |
|                    |         |              |               |                       |                   |             |                   |                         |         |
|                    |         |              |               |                       |                   |             |                   |                         |         |

Table S2. The characteristics of interventions in included studies

| Author(s)<br>and year | Theoretical<br>frameworks | Mode of<br>delivery | Format<br>(Individual, group) | Intervention<br>providers | Intervention<br>contents | Strengths used in<br>the intervention | Intervention duration<br>and frequency | Tailoring | Outcomes<br>( <i>p</i> < 0.05) |
|-----------------------|---------------------------|---------------------|-------------------------------|---------------------------|--------------------------|---------------------------------------|----------------------------------------|-----------|--------------------------------|
|                       |                           |                     |                               |                           |                          |                                       |                                        |           |                                |
|                       |                           |                     |                               |                           |                          |                                       |                                        |           |                                |
|                       |                           |                     |                               |                           |                          |                                       |                                        |           |                                |
